# Supplementary material
Source: publisher figshare collection journal article supplement (https://f1000.figshare.com/ndownloader/files/1217779)
Supplement: Supplementary file 1 [file 1217779]

Gene:	Clim2
Age:	P7
		CA1	% Ctrl CA1	CA3	% Ctrl CA3	DG	% Ctrl DG
Control	1	356.87	158.96%	298.85	142.65%	367.81	158.91%
	2	227.52	101.34%	263.32	125.69%	245.72	106.16%
	3	279.86	124.66%	268.68	128.25%	278.31	120.24%
	4	123.44	54.98%	127.34	60.78%	150.71	65.11%
	5	91.41	40.72%	92.19	44.00%	96.8	41.82%
	6	136.44	60.77%	109.23	52.14%	138.11	59.67%
	7	297.67	132.60%	305.89	146.01%	285.16	123.20%
	8	282.78	125.96%	210.5	100.48%	289.06	124.89%
	Mean	224.5	100.00%	209.5	100.00%	231.46	100.00%
	SD	96.39	42.93%	88.03	42.02%	93.01	40.19%
	SEM	34.08	15.18%	31.12	14.86%	32.88	14.21%
Treated	1	260.69	116.12%	213.76	102.03%	233.92	101.06%
	2	283.42	126.25%	235.7	112.51%	310.92	134.33%
	3	250.6	111.63%	238.73	113.95%	242.32	104.69%
	4	197.41	87.93%	161.34	77.01%	181.12	78.25%
	5	284.38	126.67%	297.79	142.14%	350.77	151.55%
	6	299.88	133.58%	226.09	107.92%	363.9	157.22%
	7	351.52	156.58%	211.48	100.94%	377.5	163.09%
	8	317.7	141.51%	240.21	114.66%	366.13	158.18%
	Mean	280.7	125.03%	228.14	108.90%	303.32	131.05%
	SD	46.32	20.63%	38.02	18.15%	74.55	32.21%
	SEM	16.38	7.29%	13.44	6.42%	26.36	11.39%
Final values
		CA1	CA3	DG
	Ctrl	100	100	100
	Trt	125.03	108.9	131.05
	SEM Ctrl	15.18	14.86	14.21
	SEM Trt	7.29	6.42	11.39
